# Supplementary material for: Self-assembly of [Sn(OPMe3)3(CF3SO3)2]6 metallocyclic Sn(ii) hexamer stacks with CF3-lined channel interiors
Source: Royal Society of Chemistry journal article supplement (doi:10.1039/d2ce01029a), 2022-01-01

## Electronic Supplementary Information

### Self-assembly of $[\text{Sn}(\text{OPMe}_3)_3(\text{CF}_3\text{SO}_3)_2]_6$ metallocyclic Sn(II) hexamer stacks with $\text{CF}_3$ -lined channel interiors

Kelsey R. Cairns, Rhys P. King, William Levason and Gillian Reid

*School of Chemistry, University of Southampton, Southampton SO17 1BJ, UK*

#### Experimental details

Infrared spectra were recorded as Nujol mulls between CsI plates using a PerkinElmer Spectrum 100 spectrometer over the range 4000–200  $\text{cm}^{-1}$ .  $^1\text{H}$ ,  $^{13}\text{C}\{^1\text{H}\}$ ,  $^{19}\text{F}\{^1\text{H}\}$ ,  $^{31}\text{P}\{^1\text{H}\}$  and  $^{119}\text{Sn}$  NMR spectra were recorded from  $\text{CD}_2\text{Cl}_2$  solutions using a Bruker AV400 spectrometer and referenced to  $\text{SiMe}_4$  via the residual solvent resonance ( $^1\text{H}$  and  $^{13}\text{C}$ ), external  $\text{CFCl}_3$  ( $^{19}\text{F}$ ), 85%  $\text{H}_3\text{PO}_4$  ( $^{31}\text{P}$ ), and  $\text{SnMe}_4$  ( $^{119}\text{Sn}$ ), respectively. Microanalyses were undertaken at Medac Ltd. n-Hexane and n-pentane were dried by distillation from sodium and  $\text{CH}_2\text{Cl}_2$  and MeCN from  $\text{CaH}_2$ , and all preparations were carried out under anhydrous conditions via a dry dinitrogen atmosphere and standard Schlenk and glovebox techniques. Tin(II) triflate, lead(II) triflate,  $\text{GeCl}_2$ (dioxane) and  $\text{OPMe}_3$  were obtained from Sigma-Aldrich.  $\text{OPMe}_3$  was sublimed freshly before use. Although formulated as “anhydrous”, the IR spectra of the commercial  $\text{M}(\text{CF}_3\text{SO}_3)_2$  ( $\text{M} = \text{Sn}$  or  $\text{Pb}$ ) typically showed varying amounts of water, however, this could be removed effectively by prolonged drying *in vacuo*.

Powder X-ray diffraction (PXRD) was carried out using a Bruker AXS D2 Phaser with  $\text{Cu K}\alpha$  X-ray source (wavelength: 1.5406 Å). The scanning range analysed covered a  $2\theta$  range of 5 – 60 °. All scans were conducted with a step size of 0.00608° and a resolution of 0.2 seconds per step.

$\text{N}_2$  physisorption measurements on compound **(1)** were performed using a Micrometrics Gemini 2375 surface area and porosity analyser at liquid nitrogen temperature (77 K). Samples were degassed under a vacuum at a temperature of 80 °C overnight. Surface area measurements and isotherms were determined using the Brunauer, Emmett and Teller (BET) model.

#### Synthesis of $[\text{Sn}(\text{OPMe}_3)_3(\text{CF}_3\text{SO}_3)_2]_6$ (**1**)

$\text{Sn}(\text{CF}_3\text{SO}_3)_2$  (83 mg, 0.2 mmol) was dissolved in  $\text{CH}_2\text{Cl}_2$  (10 mL) before the addition of  $\text{OPMe}_3$  (55 mg, 0.6 mmol) and stirred for 2 h. Particulates were removed by filtration and the solution was concentrated by 50% *in vacuo* before addition of  $\text{Et}_2\text{O}$  (5 mL) caused precipitation of a white solid. This was collected by filtration before being dried *in vacuo*. Yield: 101 mg, 73 %. Required for

$C_{11}H_{27}F_6O_9P_3S_2Sn$  (693.08): C, 19.06; H, 3.93. Found: 19.34; H, 4.14%.  $^1H$  NMR (298 K,  $CD_2Cl_2$ ):  $\delta = 1.79$  (d,  $^2J_{PH} = 13.5$  Hz).  $^{13}C\{^1H\}$  NMR (298 K,  $CD_2Cl_2$ ):  $\delta = 16.8$  (d,  $^1J_{PC} = 70.4$  Hz).  $^{19}F\{^1H\}$  NMR (298 K,  $CD_2Cl_2$ ):  $\delta = -79.1$  (s).  $^{31}P\{^1H\}$  NMR ( $CD_2Cl_2$ , 298 K):  $\delta = +60.0$  (s),  $^{119}Sn$  NMR ( $CH_2Cl_2$ , 298 K):  $\delta = -783$  (s). Single crystals suitable for single crystal X-ray analysis were grown by layering a  $CH_2Cl_2$  solution with *n*-hexane.

#### **Synthesis of $Ge(OPMe_3)_3(CF_3SO_3)_2$**

$GeCl_2$ (dioxane) (58 mg, 0.25 mmol) was dissolved in MeCN (2 mL) to which  $Me_3SiCF_3SO_3$  (111 mg, 0.50 mmol) was added as a solution in MeCN (2 mL), the solution was stirred for 1 h yielding a colourless solution, the solution was concentrated to dryness *in vacuo* to yield a white solid. This solid was dissolved in MeCN (5 mL), to this  $OPMe_3$  (100 mg, 0.75 mmol) was added as a solution in MeCN, the mixture was stirred for 1 h, the resulting colourless solution was concentrated *in vacuo* to yield an oily residue. This residue was dissolved in  $CH_2Cl_2$  (2 mL) and pentane (15 mL) was added to deposit a waxy white solid which was isolated by filtration and dried *in vacuo*. Yield: 0.072 mg, 44 %. Required for  $C_{11}H_{27}F_6GeO_9P_3S_2$  (646.97): C, 20.42; H, 4.21. Found: C, 20.74; H, 4.37, %.  $^1H$  NMR (298 K,  $CD_2Cl_2$ ):  $\delta = 1.82$  (d,  $^2J_{PH} = 13.5$  Hz).  $^{13}C\{^1H\}$  NMR (298 K,  $CD_2Cl_2$ ):  $\delta = 17.2$  (d,  $^1J_{PC} = 69.0$  Hz).  $^{19}F\{^1H\}$  NMR (298 K,  $CD_2Cl_2$ ):  $\delta = -79.0$  (s).  $^{31}P\{^1H\}$  NMR ( $CD_2Cl_2$ , 298 K):  $\delta = +62.1$  (s).

#### **Synthesis of $\{[Pb(OPMe_3)_3(CF_3SO_3)]_2(\mu-CF_3SO_3)_2\}$**

$Pb(CF_3SO_3)_2$  (152 mg, 0.3 mmol) was partially dissolved in  $CH_2Cl_2$  (10 mL) before addition of  $OPMe_3$  (83 mg, 0.9 mmol) at which point the majority of solid was taken up in solution and was stirred for 2 h. Residual particulates were removed from the solution before it was concentrated by 75%. This was layered with *n*-hexane (5mL) and stored at  $-18^\circ C$  for 24 h, yielding colourless crystals suitable for single crystal X-ray diffraction. The crystals were collected by filtration and dried *in vacuo*. Yield: 115 mg, 49%. Required for  $C_{22}H_{54}F_{12}O_{18}P_6S_4Pb_2$  (1563.13): C, 16.90; H, 3.48. Found: C, 17.17; H, 3.63%.  $^1H$  NMR ( $CD_2Cl_2$ , 298 K):  $\delta = 1.66$  (d,  $^2J_{PH} = 13.7$  Hz).  $^{13}C\{^1H\}$  NMR (298 K,  $CD_2Cl_2$ ):  $\delta = 17.3$  (d,  $^1J_{PC} = 70$  Hz).  $^{19}F\{^1H\}$  NMR ( $CD_2Cl_2$ , 298 K):  $\delta = -79.4$  (s).  $^{31}P\{^1H\}$  NMR ( $CD_2Cl_2$ , 298 K):  $\delta = +59.0$  (s).

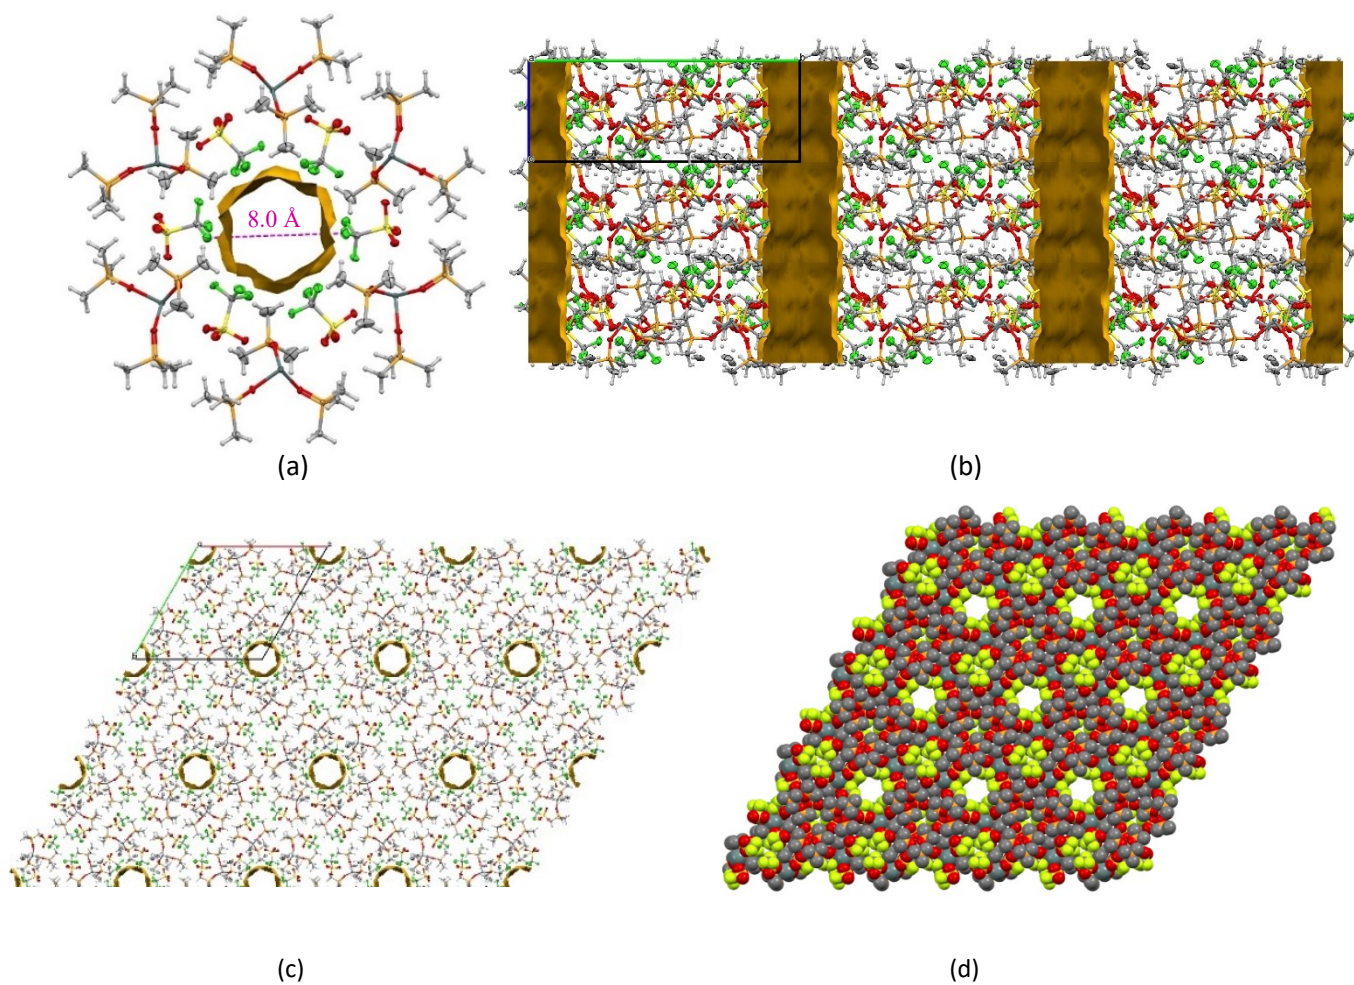

Figure S1 (a) View of a discrete  $[\text{Sn}(\text{OPMe}_3)_3(\text{CF}_3\text{SO}_3)_2]_6$  hexamer showing the pore diameter; (b) view along the *a*-axis showing the hydrophobic channels (brown); (c) the extended lattice viewed down the *c*-direction; (d) space filling vesion of the lattice viewed down the *c*-direction.

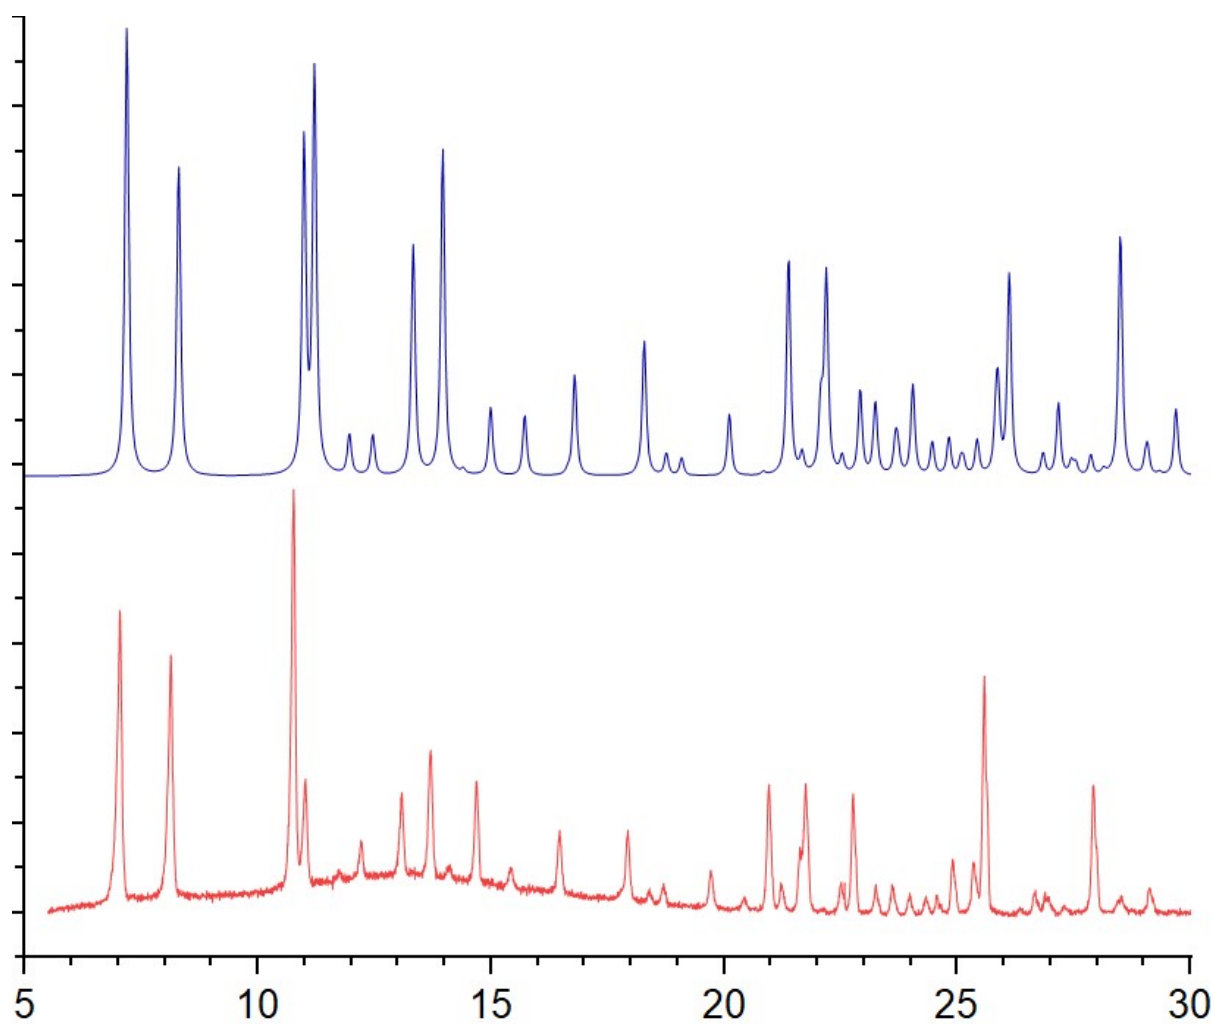

Figure S2 Top: PXRD pattern for  $[\text{Sn}(\text{OPMe}_3)_3(\text{CF}_3\text{SO}_3)_2]_6$  simulated from the single crystal structure data; collected at 100 K; bottom: PXRD pattern recorded from the bulk powder isolated from the preparation of  $[\text{Sn}(\text{OPMe}_3)_3(\text{CF}_3\text{SO}_3)_2]_6$  (298 K). The variations in intensity between some of the peaks suggests some preferred orientation.

## X-ray Experimental

Crystals of the complexes were grown as described in the Experimental section. Data collections used a Rigaku AFC12 goniometer equipped with an enhanced sensitivity (HG) Saturn724+ detector mounted at the window of an FR-E+ SuperBright molybdenum ( $\lambda = 0.71073 \text{ \AA}$ ) rotating anode generator with VHF Varimax optics (70  $\mu\text{m}$  focus) with the crystal held at 100 K, or an Agilent Xcalibur Gemini S diffractometer with a CCD plate detector using Mo K $\alpha$  ( $\lambda = 0.71073 \text{ \AA}$ ) radiation with the crystal held at 100 K. Structure solution and refinement were performed using SHELX(S/L)97, SHELX2013, or SHELX-2014/7 using Olex.<sup>1-3</sup> Details of the crystallographic parameters are given in Table S1. In the structure of  $[\text{Sn}(\text{OPMe}_3)_3(\text{CF}_3\text{SO}_3)_2]_6$ , some rotational disorder of the C atoms associated with the Me groups was evident. This was resolved satisfactorily by refining split C atom occupancies for these, leading to an 80%:20% split; the discussion and figures refer to the major component. Applying a solvent mask indicates one disordered  $\text{C}_6\text{H}_{14}$  molecule per hexamer unit.

Table S1 Crystallographic data<sup>a</sup>

|                                                           |                                                                                                                                     |                                                                                                                                            |
|-----------------------------------------------------------|-------------------------------------------------------------------------------------------------------------------------------------|--------------------------------------------------------------------------------------------------------------------------------------------|
| Compound                                                  | [Sn(OPMe <sub>3</sub> ) <sub>3</sub> (CF <sub>3</sub> SO <sub>3</sub> ) <sub>2</sub> ] <sub>6</sub> ·C <sub>6</sub> H <sub>14</sub> | [(Pb(OPMe <sub>3</sub> ) <sub>3</sub> (CF <sub>3</sub> SO <sub>3</sub> )) <sub>2</sub> (μ-CF <sub>3</sub> SO <sub>3</sub> ) <sub>2</sub> ] |
| Formula                                                   | C <sub>11</sub> H <sub>27</sub> F <sub>6</sub> O <sub>9</sub> P <sub>3</sub> S <sub>2</sub> Sn·0.167C <sub>6</sub> H <sub>14</sub>  | C <sub>11</sub> H <sub>27</sub> F <sub>6</sub> O <sub>9</sub> P <sub>3</sub> PbS <sub>2</sub>                                              |
| M                                                         | 707.40                                                                                                                              | 781.54                                                                                                                                     |
| Crystal system                                            | Trigonal                                                                                                                            | Monoclinic                                                                                                                                 |
| Space group (no.)                                         | P-3 (147)                                                                                                                           | P2 <sub>1</sub> /c (14)                                                                                                                    |
| a /Å                                                      | 24.5947(4)                                                                                                                          | 9.7633(3)                                                                                                                                  |
| b /Å                                                      | 24.5947(4)                                                                                                                          | 14.2131(4)                                                                                                                                 |
| c /Å                                                      | 7.88970(10)                                                                                                                         | 18.8859(5)                                                                                                                                 |
| α /°                                                      | 90                                                                                                                                  | 90                                                                                                                                         |
| β /°                                                      | 90                                                                                                                                  | 98.257(2)                                                                                                                                  |
| γ /°                                                      | 120                                                                                                                                 | 90                                                                                                                                         |
| U /Å <sup>3</sup>                                         | 4133.08(14)                                                                                                                         | 2593.57(13)                                                                                                                                |
| Z                                                         | 6                                                                                                                                   | 4                                                                                                                                          |
| μ(Mo-K <sub>α</sub> ) /mm <sup>-1</sup>                   | 1.330                                                                                                                               | 6.931                                                                                                                                      |
| F(000)                                                    | 2126                                                                                                                                | 1512                                                                                                                                       |
| Total no. reflns                                          | 23416                                                                                                                               | 30244                                                                                                                                      |
| R <sub>int</sub>                                          | 0.023                                                                                                                               | 0.041                                                                                                                                      |
| Unique reflns                                             | 6587                                                                                                                                | 6662                                                                                                                                       |
| No. of params, restraints                                 | 311, 3                                                                                                                              | 298, 0                                                                                                                                     |
| GOF                                                       | 1.043                                                                                                                               | 1.026                                                                                                                                      |
| R <sub>1</sub> , wR <sub>2</sub> [I > 2σ(I)] <sup>b</sup> | 0.019, 0.048                                                                                                                        | 0.022, 0.043                                                                                                                               |
| R <sub>1</sub> , wR <sub>2</sub> (all data)               | 0.022, 0.047                                                                                                                        | 0.022, 0.045                                                                                                                               |

<sup>a</sup> common data: wavelength (Mo-K<sub>α</sub>) = 0.71073 Å; θ(max) = 27.5°; <sup>b</sup> R<sub>1</sub> = Σ||F<sub>o</sub>| - |F<sub>c</sub>|| / Σ|F<sub>o</sub>|; wR<sub>2</sub> = [Σw(F<sub>o</sub><sup>2</sup> - F<sub>c</sub><sup>2</sup>)<sup>2</sup> / ΣwF<sub>o</sub><sup>4</sup>]<sup>1/2</sup>

1. G. M. Sheldrick, *Acta Crystallog. Sect. C*, 2015, 71, 3.
2. G. M. Sheldrick, *Acta Crystallogr., Sect. A: Found. Crystallogr.*, 2008, 64, 112.
3. O. V. Dolomanov, L. J. Bourhis, R. J. Gildea, J. A. K. Howard, H. Puschmann, *J. Appl. Crystallogr.*, 2009, 42, 339.

Figure S3: Spectroscopic data for  $[\text{Sn}(\text{OPMe}_3)_3(\text{CF}_3\text{SO}_3)_2]_6$  (**1**)

$^1\text{H}$  NMR spectrum ( $\text{CD}_2\text{Cl}_2$ )

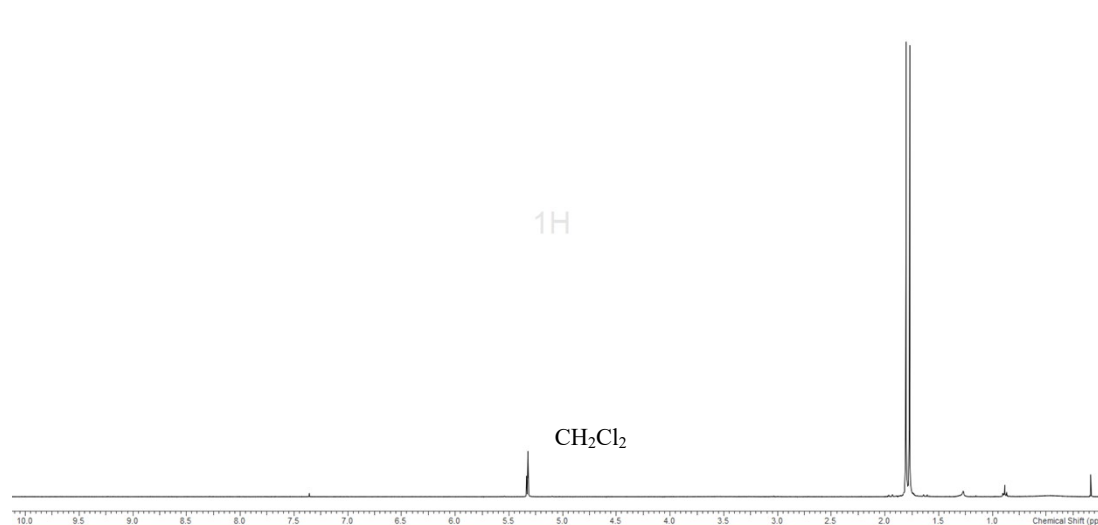

$^{13}\text{C}\{^1\text{H}\}$  NMR spectrum ( $\text{CD}_2\text{Cl}_2$ )

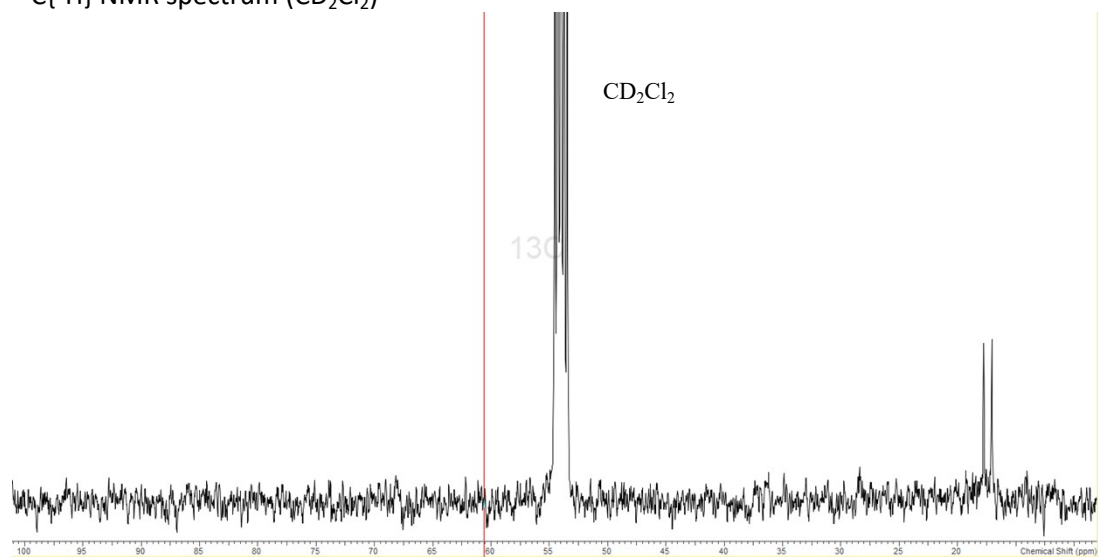

$^{19}\text{F}\{^1\text{H}\}$  NMR spectrum ( $\text{CH}_2\text{Cl}_2$ )

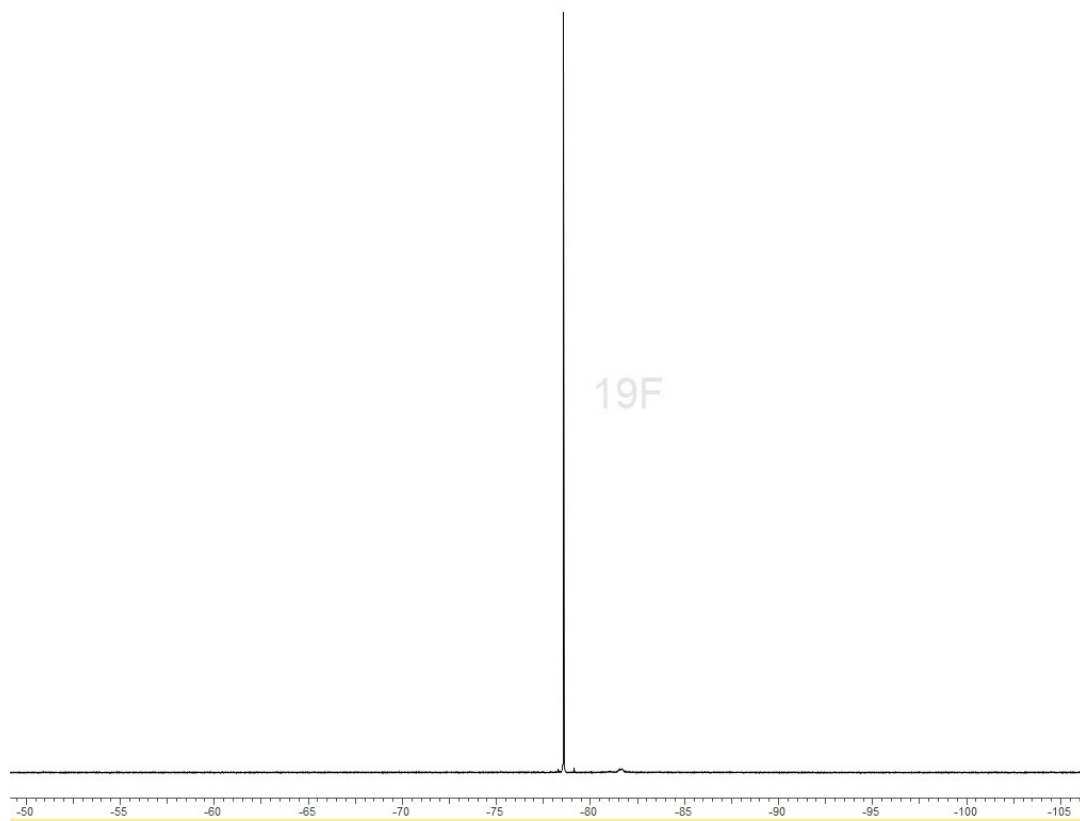

$^{31}\text{P}\{^1\text{H}\}$  NMR spectrum ( $\text{CH}_2\text{Cl}_2$ )

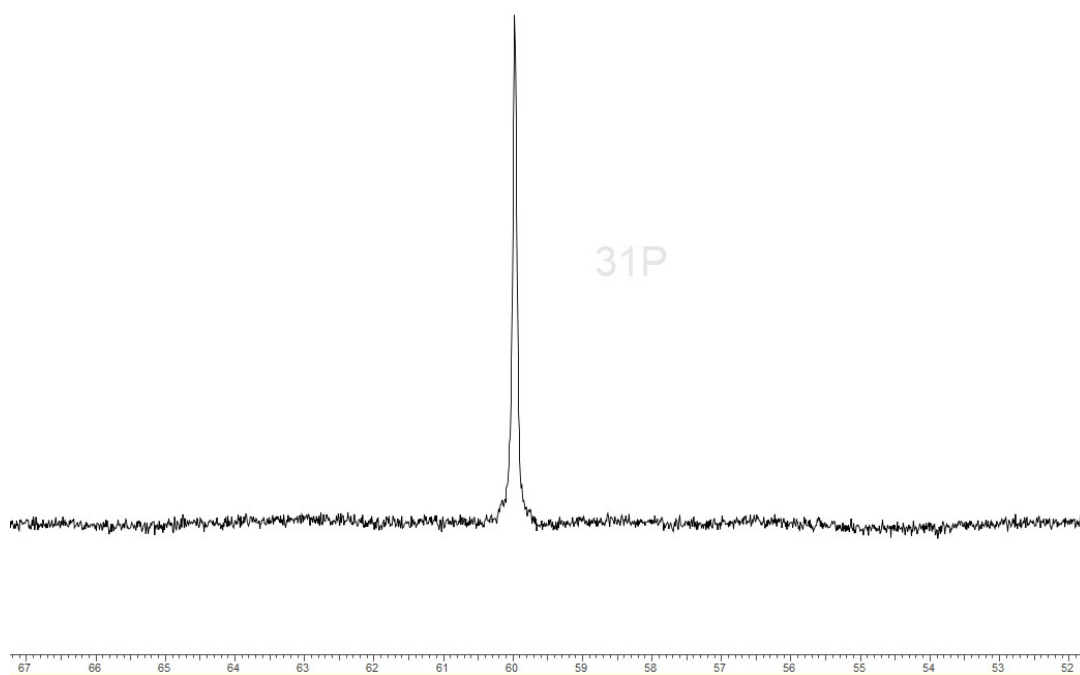



$^{119}\text{Sn}$  NMR spectrum ( $\text{CH}_2\text{Cl}_2$ )

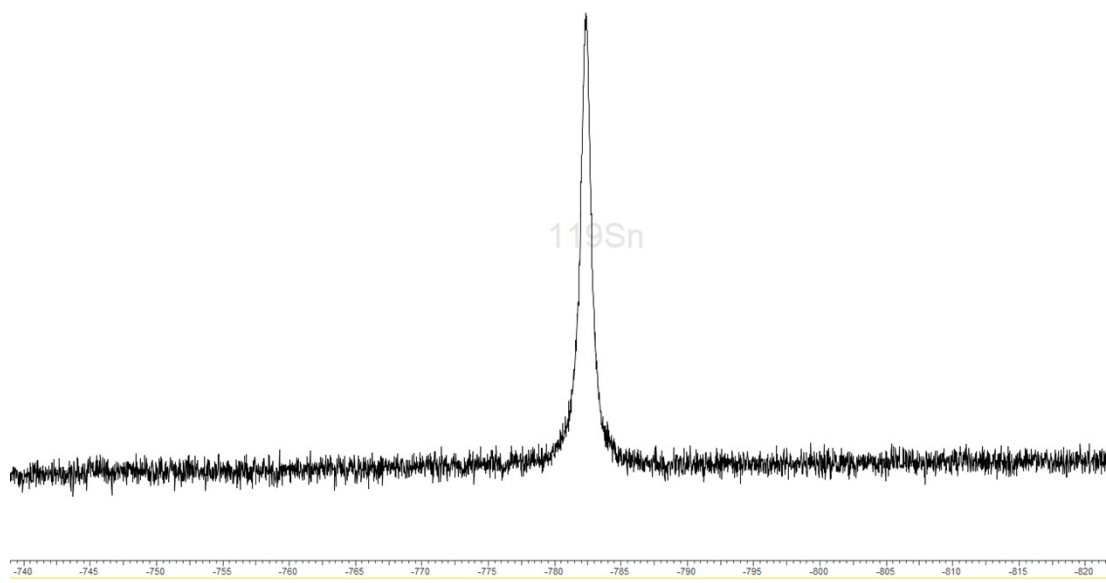

IR spectrum (Nujol)

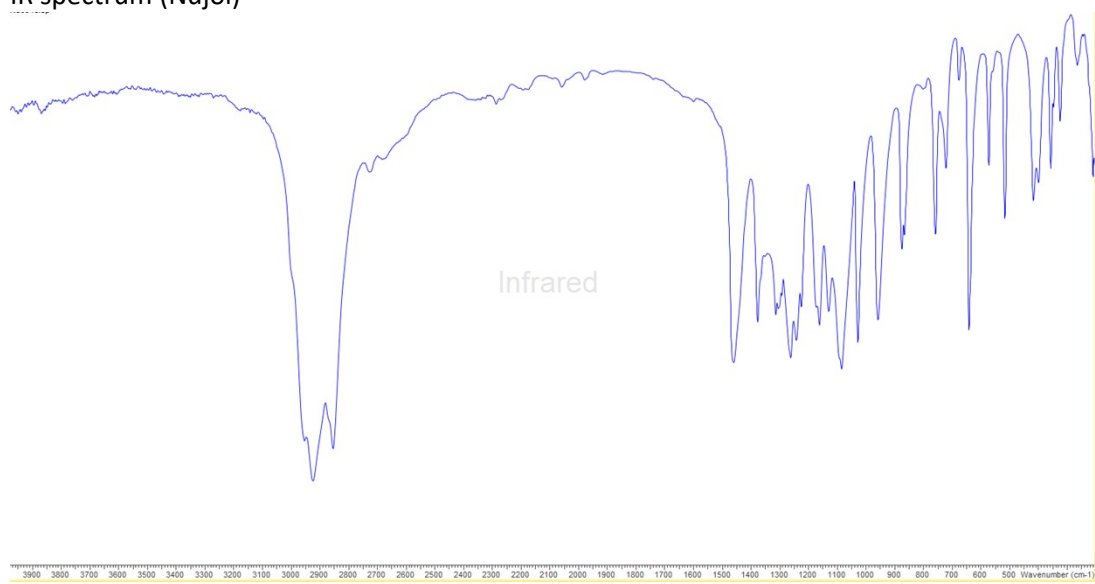

Figure S4 Spectroscopic data for  $[\text{Ge}(\text{OPMe}_3)_3][\text{OTf}]_2$  (**2**)

$^1\text{H}$  NMR spectrum ( $\text{CD}_2\text{Cl}_2$ , 298 K)

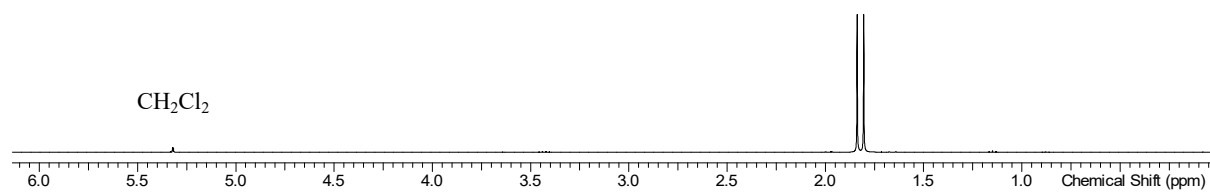

$^{13}\text{C}\{^1\text{H}\}$  NMR spectrum ( $\text{CD}_2\text{Cl}_2$ , 298 K)

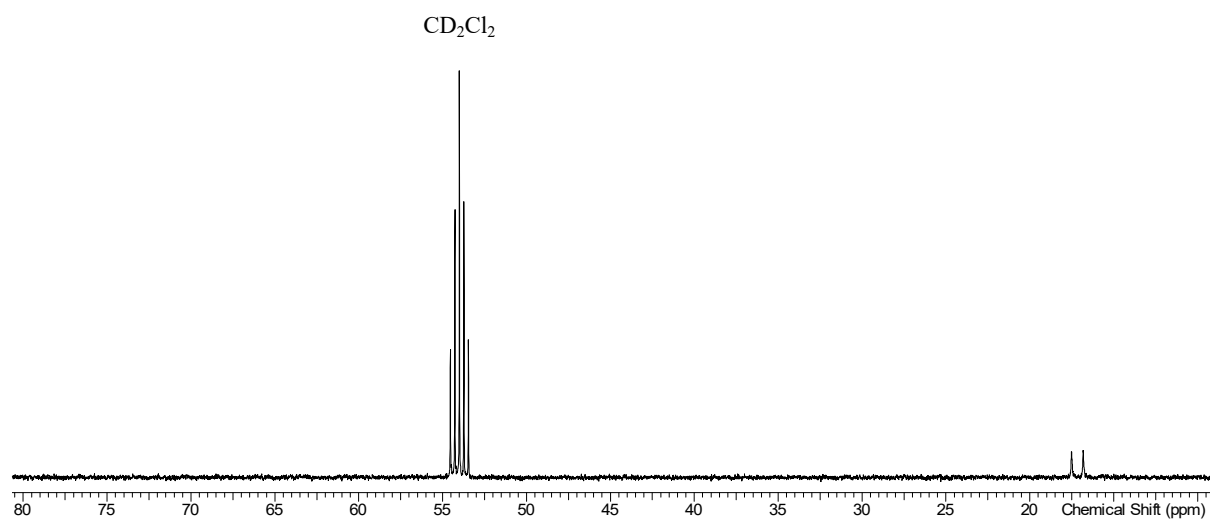

$^{19}\text{F}\{^1\text{H}\}$  NMR spectrum ( $\text{CD}_2\text{Cl}_2$ , 298 K)

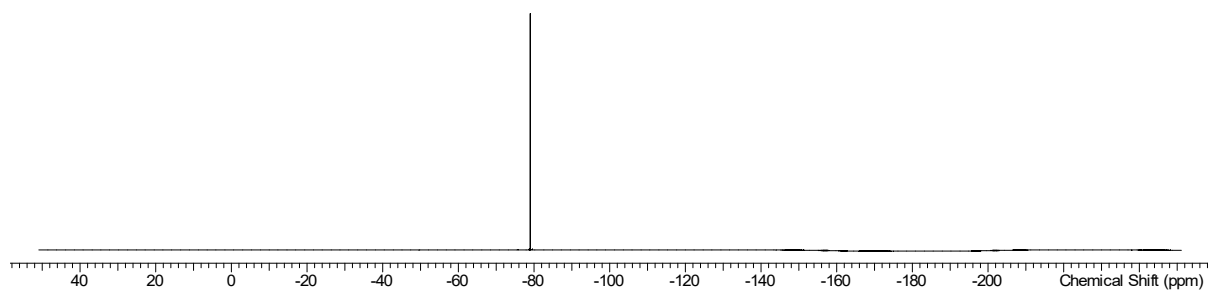

$^{31}\text{P}\{^1\text{H}\}$  NMR spectrum ( $\text{CD}_2\text{Cl}_2$ , 298 K)

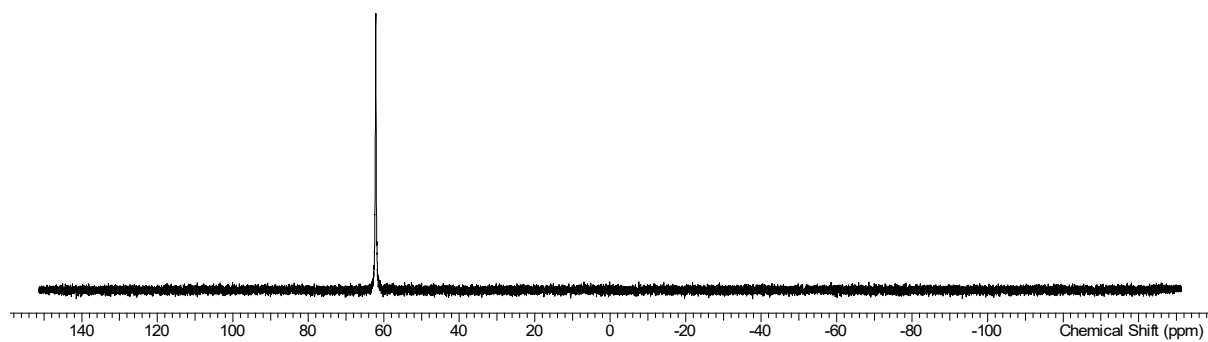

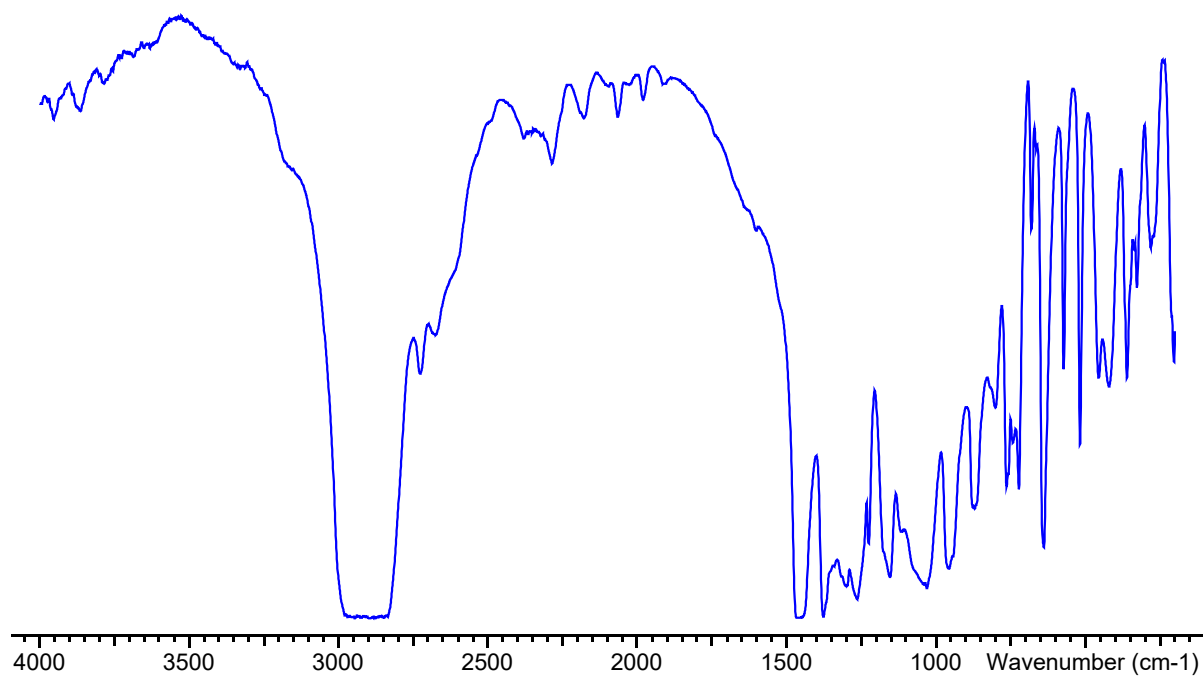

Figure S5 Spectroscopic data for  $[\{\text{Pb}(\text{OPMe}_3)_3(\text{CF}_3\text{SO}_3)\}_2(\mu\text{-CF}_3\text{SO}_3)_2]$  (**3**)

<sup>1</sup>H NMR spectrum (CD<sub>3</sub>CN)

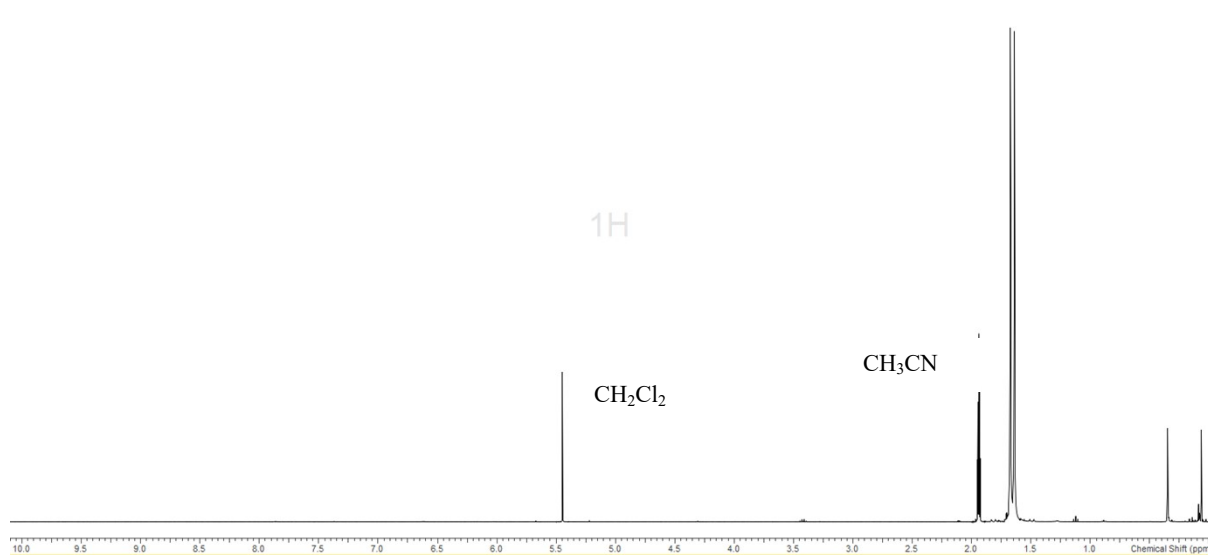

$^{13}\text{C}\{^1\text{H}\}$  NMR spectrum ( $\text{CD}_3\text{CN}$ )

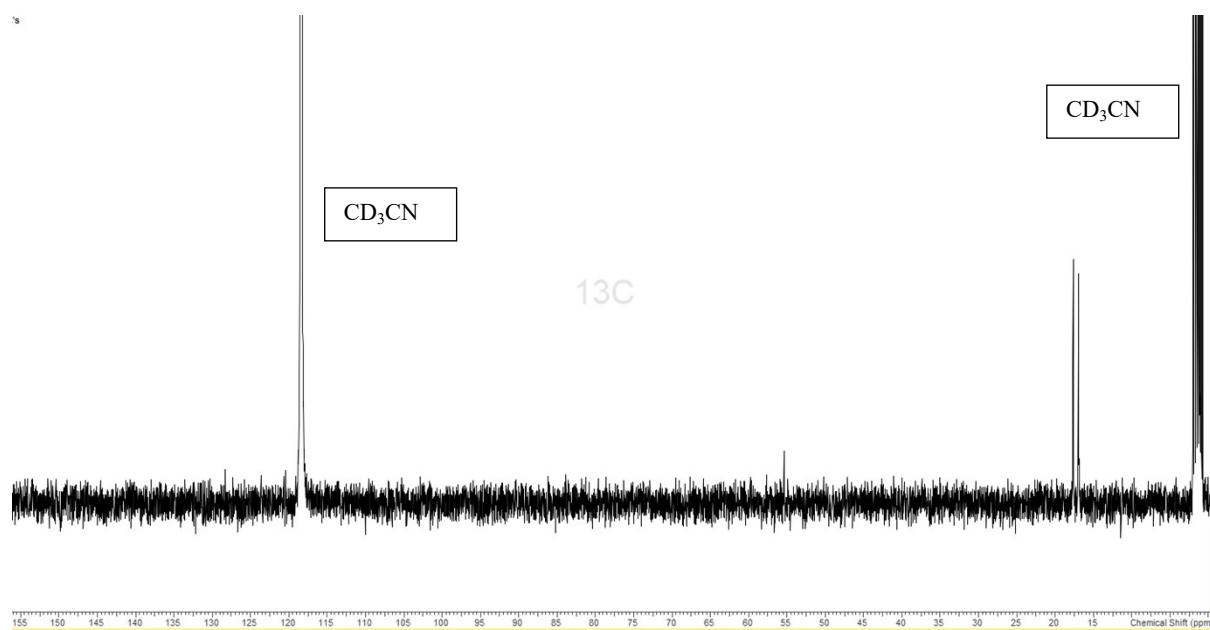

$^{19}\text{F}\{^1\text{H}\}$  NMR spectrum ( $\text{CD}_3\text{CN}$ )

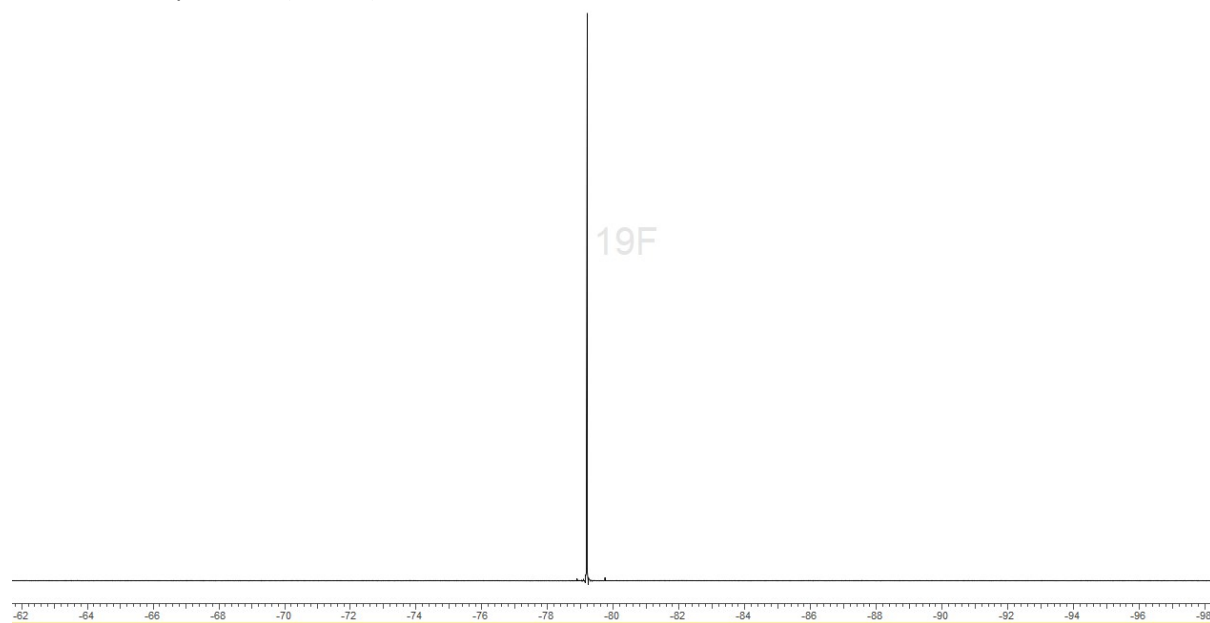

$^{31}\text{P}\{^1\text{H}\}$  NMR spectrum ( $\text{CD}_3\text{CN}$ )

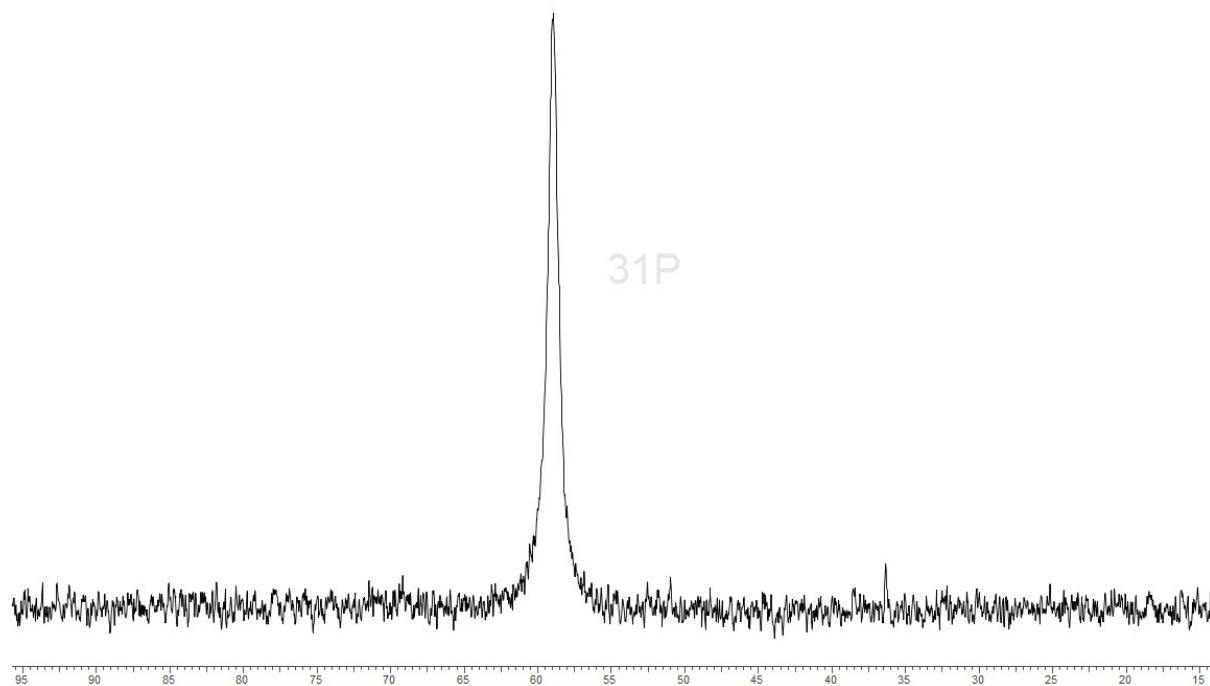

IR spectrum (Nujol)

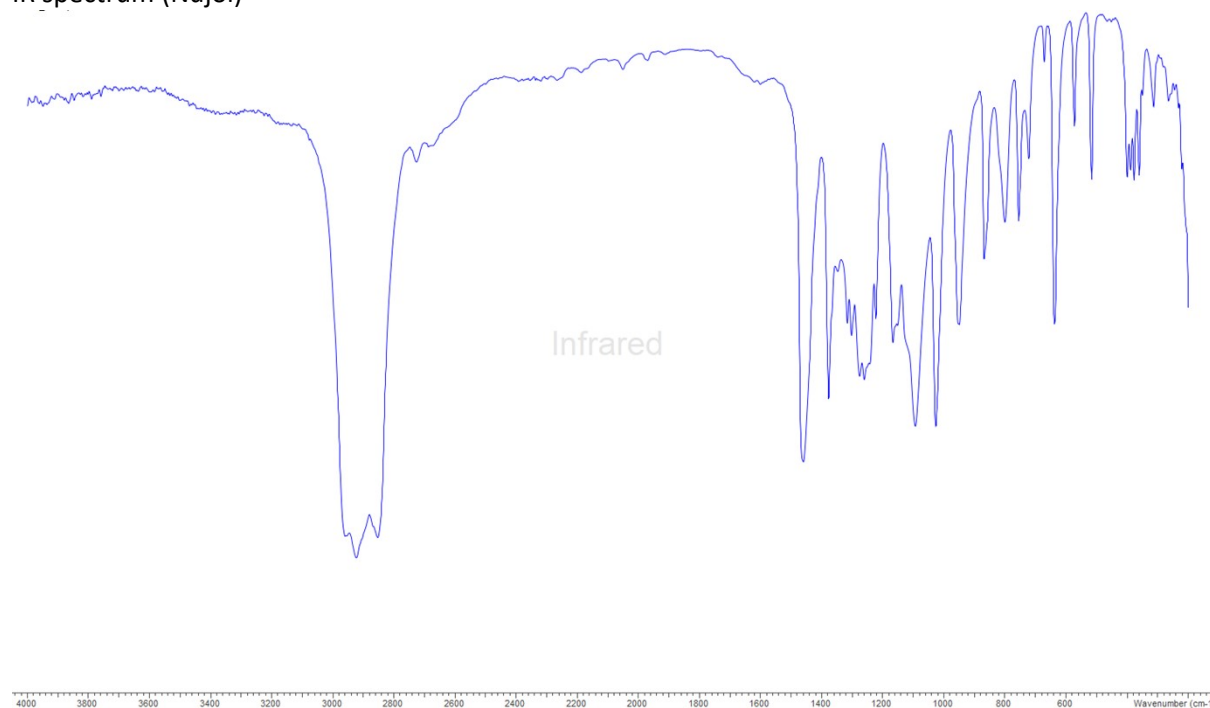

Supplement: d2ce01029a1.pdf [file d2ce01029a1.pdf]
